# Supplementary material for: Pressure-controlled synthesis of high-performance SrLiAl3N4:Eu2+ narrow-band red phosphors
Source: Royal Society of Chemistry journal article supplement (doi:10.1039/c8tc03025a), 2018-01-01
Supplement: c8tc03025a1.pdf [file c8tc03025a1.pdf]

## SUPPORTING INFORMATION

# Pressure-Controlled Synthesis of High-Performance SrLiAl<sub>3</sub>N<sub>4</sub>:Eu<sup>2+</sup> Narrow-Band Red Phosphors

Mu-Huai Fang,<sup>a</sup> Yi-Ting Tsai,<sup>a</sup> Hwo-Shuenn Sheu,<sup>b</sup> Jyh-Fu Lee,<sup>b</sup> and Ru-Shi Liu<sup>\*,a,c</sup>

<sup>a</sup>Department of Chemistry, National Taiwan University Taipei 106, Taiwan.

<sup>b</sup>National Synchrotron Radiation Research Center, Hsinchu City 300, Taiwan.

<sup>c</sup>Department of Mechanical Engineering and Graduate Institute of Manufacturing Technology National Taipei University of Technology Taipei 106, Taiwan.

## EXPERIMENTAL METHODS

**Reagents.** Strontium nitride ( $\text{Sr}_3\text{N}_2$ , 99.5%) and europium nitride (EuN, 99.9%) were obtained from Materion. Aluminum nitride (AlN, 97%) was acquired from Tokuyama Corporation. Lithium nitride ( $\text{Li}_3\text{N}$ , 99%) was supplied by Kojundo Chemical Laboratory.

**Synthesis of  $\text{SrLiAl}_3\text{N}_4:\text{Eu}^{2+}$ .**  $\text{Eu}^{2+}$ -doped  $\text{SrLiAl}_3\text{N}_4$  red phosphor was synthesized through a solid-state reaction. Stoichiometric amounts of  $\text{Sr}_3\text{N}_2$ ,  $\text{Li}_3\text{N}$ , EuN, and AlN were carefully ground in a glove box ( $\text{O}_2 < 1$  ppm,  $\text{H}_2\text{O} < 1$  ppm). The well-mixed precursors were loaded into BN crucibles, which were subjected to hot isostatic pressing (HIP) and gas pressure sintering (GPS). The pressure was increased up to the set point by using a compressor. The furnace was heated to 1,000 °C under different pressure levels for 4 h. The furnace was cooled to room temperature, and the pressure was released to atmospheric pressure. Finally, the as-prepared samples were ground and kept in the glove box for characterization.

**Characterization.** The phase and purity of the as-prepared powder samples were examined by X-ray diffraction (XRD) analysis using a D2 PHASER diffractometer (Bruker) with  $\text{CuK}\alpha$  radiation source ( $\lambda = 1.5418$  Å). Fine structure data including lattice parameters and atom position were obtained by synchrotron X-ray diffraction analysis ( $\lambda = 0.774910$  Å) of BL01C2 beamline with a Debye–Scherrer camera at the National Synchrotron Radiation Research Center (NSRRC), Taiwan. Rietveld refinement was conducted with Total Pattern Analysis Solutions (TOPAS) 4.2 software. Photoluminescence properties were analyzed by a 150 W Xe lamp and a Hamamatsu R928 photomultiplier tube equipped with a FluoroMax-3 spectrophotometer (HORIBA, Japan). Morphologies of the samples were examined by a scanning electron microscope (SEM, JSM-6700F). The ratio of  $\text{Eu}^{2+}/\text{Eu}^{3+}$  was examined by Eu  $L_3$ -edge of X-ray absorption near-edge structure spectroscopy in fluorescence mode at BL17 beamline in NSRRC, Taiwan. Internal quantum efficiency, absorption, and external quantum efficiency were determined using an absolute PL quantum yield spectrometer (QY C11347, Hamamatsu, Japan). The ratio of atomic composition was determined through ICP-AES analysis (Agilent 725-ES ICP-AES, USA).

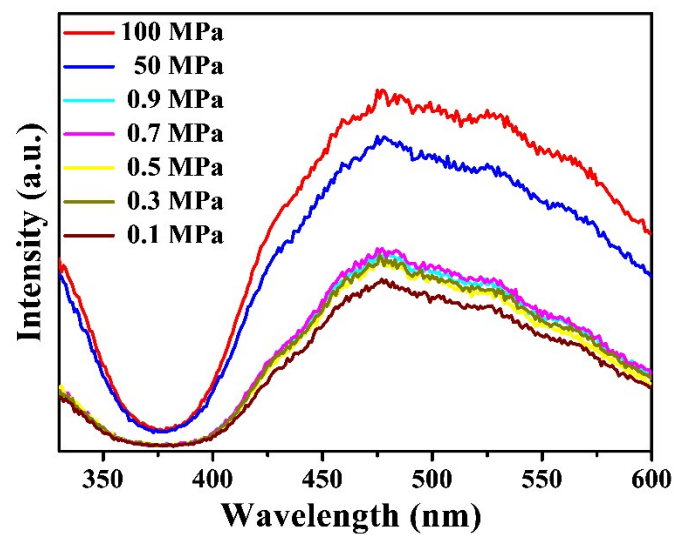

Figure S1. Photoluminescence excitation spectra of SLA synthesized under different gas pressure levels.

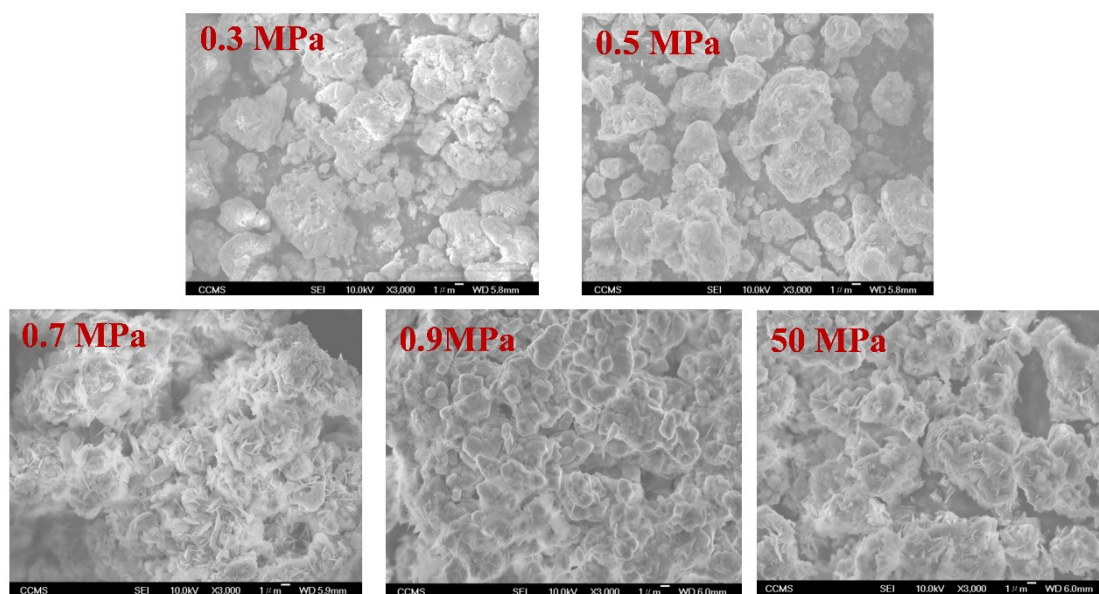

Figure S2. SEM images of SLA synthesized at 0.3, 0.5, 0.7, 0.9, and 50 MPa.

Table S1. Rietveld refinement results of sample fabricated at 0.1 MPa.

|                     |                                                       |                                                                                       |                              |
|---------------------|-------------------------------------------------------|---------------------------------------------------------------------------------------|------------------------------|
| Space group         | $P\bar{1}$                                            |                                                                                       |                              |
| Cell Parameters     | a = 5.8611(3) Å<br>b = 7.4808(4) Å<br>c = 9.9505(3) Å | $\alpha = 83.602(2)^\circ$<br>$\beta = 76.758(2)^\circ$<br>$\gamma = 79.570(3)^\circ$ | V = 416.07(4) Å <sup>3</sup> |
| Reliability Factors | $\chi^2 = 1.89$<br>$R_{wp} = 7.94\%$ $R_p = 5.77\%$   |                                                                                       |                              |

| Atoms      | x          | y          | z          | Frac      | Beq (Å <sup>2</sup> ) |
|------------|------------|------------|------------|-----------|-----------------------|
| <b>Sr1</b> | 0.0019(21) | 0.1334(17) | 0.1286(12) | 0.990(11) | 1.0                   |
| <b>Sr2</b> | 0.0186(17) | 0.3810(17) | 0.3715(12) | 0.991(11) | 1.0                   |
| <b>Al1</b> | 0.5469(32) | 0.9527(28) | 0.1240(25) | 0.953(39) | 1.0                   |
| <b>Al2</b> | 0.1818(32) | 0.9518(29) | 0.3991(25) | 1.000(41) | 1.0                   |
| <b>Al3</b> | 0.1670(34) | 0.7066(31) | 0.1532(27) | 1.000(36) | 1.0                   |
| <b>Al4</b> | 0.8247(30) | 0.5563(29) | 0.1035(24) | 1.000(40) | 1.0                   |
| <b>Al5</b> | 0.4711(36) | 0.5580(38) | 0.3741(28) | 1.000(31) | 1.0                   |
| <b>Al6</b> | 0.5645(35) | 0.2044(37) | 0.3665(29) | 1.000(41) | 1.0                   |
| <b>N1</b>  | 0.3657(91) | 0.8568(78) | 0.0183(61) | 1.000(78) | 1.0                   |
| <b>N2</b>  | 0.3729(98) | 0.3408(87) | 0.5234(57) | 1.000(73) | 1.0                   |
| <b>N3</b>  | 0.3703(95) | 0.0883(82) | 0.2677(64) | 1.000(81) | 1.0                   |
| <b>N4</b>  | 0.1556(81) | 0.9425(74) | 0.5917(59) | 1.000(71) | 1.0                   |
| <b>N5</b>  | 0.8437(80) | 0.7921(75) | 0.1431(63) | 1.000(80) | 1.0                   |
| <b>N6</b>  | 0.1906(77) | 0.4968(70) | 0.0779(57) | 1.000(65) | 1.0                   |
| <b>N7</b>  | 0.1773(79) | 0.6962(69) | 0.3484(61) | 1.000(75) | 1.0                   |
| <b>N8</b>  | 0.6538(73) | 0.4091(67) | 0.2286(56) | 1.000(81) | 1.0                   |
| <b>Li1</b> | 0.444(20)  | 0.328(16)  | 0.127(14)  | 1.00(15)  | 1.0                   |
| <b>Li2</b> | 0.201(19)  | 0.192(18)  | 0.647(16)  | 1.00(15)  | 1.0                   |

Table S2. Rietveld refinement results of sample fabricated at 100 MPa.

|                     |                                                                                                                                                                                                          |            |            |             |                                       |
|---------------------|----------------------------------------------------------------------------------------------------------------------------------------------------------------------------------------------------------|------------|------------|-------------|---------------------------------------|
| Space group         | $P\bar{1}$                                                                                                                                                                                               |            |            |             |                                       |
| Cell Parameters     | $a = 5.8620(4) \text{ \AA}$ $\alpha = 83.652(3)^\circ$<br>$b = 7.4770(4) \text{ \AA}$ $\beta = 76.652(4)^\circ$ $V = 415.55 (4) \text{ \AA}^3$<br>$c = 9.9379(5) \text{ \AA}$ $\gamma = 79.442(4)^\circ$ |            |            |             |                                       |
| Reliability Factors | $\chi^2 = 2.15$<br>$R_{wp} = 8.35 \%$ $R_p = 5.62 \%$                                                                                                                                                    |            |            |             |                                       |
| <b>Atoms</b>        | <b>x</b>                                                                                                                                                                                                 | <b>y</b>   | <b>z</b>   | <b>Frac</b> | <b>Beq(<math>\text{\AA}^2</math>)</b> |
| <b>Sr1</b>          | 0.0079(27)                                                                                                                                                                                               | 0.1317(22) | 0.1280(16) | 1.000(13)   | 1.0                                   |
| <b>Sr2</b>          | 0.0148(24)                                                                                                                                                                                               | 0.3773(24) | 0.3715(16) | 1.000(13)   | 1.0                                   |
| <b>Al1</b>          | 0.5426(70)                                                                                                                                                                                               | 0.9609(59) | 0.1296(41) | 1.000(52)   | 1.0                                   |
| <b>Al2</b>          | 0.1779(61)                                                                                                                                                                                               | 0.9407(63) | 0.4007(49) | 1.000(63)   | 1.0                                   |
| <b>Al3</b>          | 0.1694(81)                                                                                                                                                                                               | 0.7025(57) | 0.1484(56) | 0.992(45)   | 1.0                                   |
| <b>Al4</b>          | 0.8148(68)                                                                                                                                                                                               | 0.5552(64) | 0.1108(47) | 1.000(62)   | 1.0                                   |
| <b>Al5</b>          | 0.4778(64)                                                                                                                                                                                               | 0.5575(58) | 0.3756(49) | 1.000(42)   | 1.0                                   |
| <b>Al6</b>          | 0.5746(54)                                                                                                                                                                                               | 0.2018(57) | 0.3693(44) | 1.000(55)   | 1.0                                   |
| <b>N1</b>           | 0.368(13)                                                                                                                                                                                                | 0.859(13)  | 0.026(10)  | 1.00(12)    | 1.0                                   |
| <b>N2</b>           | 0.348(13)                                                                                                                                                                                                | 0.355(13)  | 0.520(10)  | 1.00(11)    | 1.0                                   |
| <b>N3</b>           | 0.370(14)                                                                                                                                                                                                | 0.091(12)  | 0.264(10)  | 1.00(12)    | 1.0                                   |
| <b>N4</b>           | 0.150(12)                                                                                                                                                                                                | 0.948(14)  | 0.5795(95) | 1.000(97)   | 1.0                                   |
| <b>N5</b>           | 0.864(11)                                                                                                                                                                                                | 0.794(13)  | 0.154(10)  | 1.00(10)    | 1.0                                   |
| <b>N6</b>           | 0.211(12)                                                                                                                                                                                                | 0.458(12)  | 0.081(10)  | 1.00(10)    | 1.0                                   |
| <b>N7</b>           | 0.199(11)                                                                                                                                                                                                | 0.708(14)  | 0.3530(96) | 1.000(96)   | 1.0                                   |
| <b>N8</b>           | 0.634(15)                                                                                                                                                                                                | 0.403(13)  | 0.236(10)  | 1.00(14)    | 1.0                                   |
| <b>Li1</b>          | 0.457(25)                                                                                                                                                                                                | 0.324(23)  | 0.121(21)  | 1.00(21)    | 1.0                                   |
| <b>Li2</b>          | 0.182(23)                                                                                                                                                                                                | 0.193(27)  | 0.643(23)  | 1.00(17)    | 1.0                                   |
